# Supplementary material for: Chain confinement promotes β-phase formation in polyfluorene-based photoluminescent ionogels
Source: Royal Society of Chemistry journal article supplement (doi:10.1039/c2cc18022g), 2012-01-01
Supplement: c2cc18022g.pdf [file c2cc18022g.pdf]

## Electronic Supplementary Information

### Chain confinement promotes $\beta$ -phase formation in polyfluorene-based luminescent ionogels

Rachel C. Evans<sup>a\*</sup> and Patricia C. Marr<sup>b</sup>

<sup>a</sup> School of Chemistry, Trinity College Dublin, Dublin 2, Ireland.

Tel: + 353 (0) 1 896 4215. Email: raevans@tcd.ie

<sup>b</sup> School of Chemistry and Chemical Engineering, The Queens University of Belfast, The David Keir Building, Stranmills Road, Belfast, BT9 5AG, United Kingdom.

Tel: +44 (0) 28 90 975418. Email: p.marr@qub.ac.uk.

#### 1. General

[Bmim]<sup>+</sup> [NTf<sub>2</sub>]<sup>-</sup> was prepared at QUB using by published procedures.<sup>1</sup> TEOS (Sigma Aldrich) was used as purchased. All other reagents were used as commercially available. The conjugated polymers poly(9,9-di-*n*-octylfluorenyl-2,7-diyl)(PFO, Sigma-Aldrich, M<sub>n</sub> = 15,834 g/mol, PDI = 3.7), poly[(9,9-dihexylfluorenyl-2,7-diyl)-*alt*-co-(2-methoxy-5-{2-ethylhexyloxy}-1,4-phenylene)] (PFPV, ADS Inc, M<sub>n</sub> = 17,000 g/mol, PDI = 5.5.), poly[(9,9-di-*n*-octylfluorenyl-2,7-diyl)-*alt*-(benzo[2,1,3]thiadiazol-4,8-diyl)] (P8BT, Sigma-Aldrich, average M<sub>n</sub> = 10,000-20,000 g/mol) and poly(9-vinylcarbazole) (PVK, Sigma-Aldrich, average M<sub>n</sub> = 25,000-50,000 g/mol) were used without further purification.

Fourier Transform Infrared (FTIR) spectra were recorded on a Perkin-Elmer Spectrum 100 FTIR spectrometer at room temperature between 4000-400 cm<sup>-1</sup> with a resolution of 1 cm<sup>-1</sup>. To obtain a reasonable signal to noise ratio the average of 64 scans was taken. Powder X-ray diffraction patterns were recorded using a Siemens D500 diffractometer using Cu K $\alpha$  radiation ( $\lambda$  = 1.54 Å) from 5-700° (2 $\theta$ ). Solution phase photoluminescence spectra were measured on a Varian-Cary Eclipse fluorimeter. Solid-state photoluminescence spectra of the monolithic CP-ionogel samples were recorded on a Horiba-Jobin-Yvon Fluorolog-3 spectrometer using a Horiba-Jobin-Yvon integrating sphere. Emission and excitation spectra were corrected for the wavelength response of the system using correction factors supplied by the manufacturer. PL quantum yields were determined using the method previously described.<sup>2</sup> The experimental error is 10%. Appropriate excitation and emission wavelengths were selected for each system and the excitation and emission slit widths were both typically 1.0 nm. The effect of mechanical force on the optical properties of PFO-IG was investigated by grinding and pressing (~10 megagrams) a portion of the sample using a KBr die assembly.

Solid-state nuclear magnetic resonance (NMR) spectroscopy was conducted by the EPSRC service at the University of Durham. <sup>13</sup>C and <sup>29</sup>Si were obtained using a Varian Unity Inova spectrometer operating at 75.40 MHz for <sup>13</sup>C and 59.56 MHz for <sup>29</sup>Si.

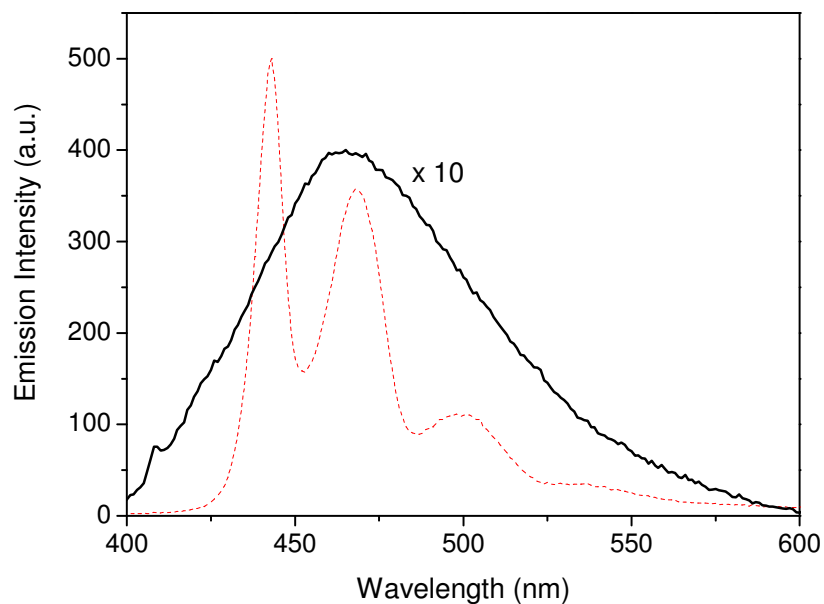

**Figure S1.** Room temperature photoluminescence spectrum of **BL-IG** (solid black line) excited at 370 nm (PLQY = 2.5%). To enable visual comparison with the **PFO-IG** spectrum (red dotted line), the emission data for **BL-IG** have been multiplied by a factor of 10.

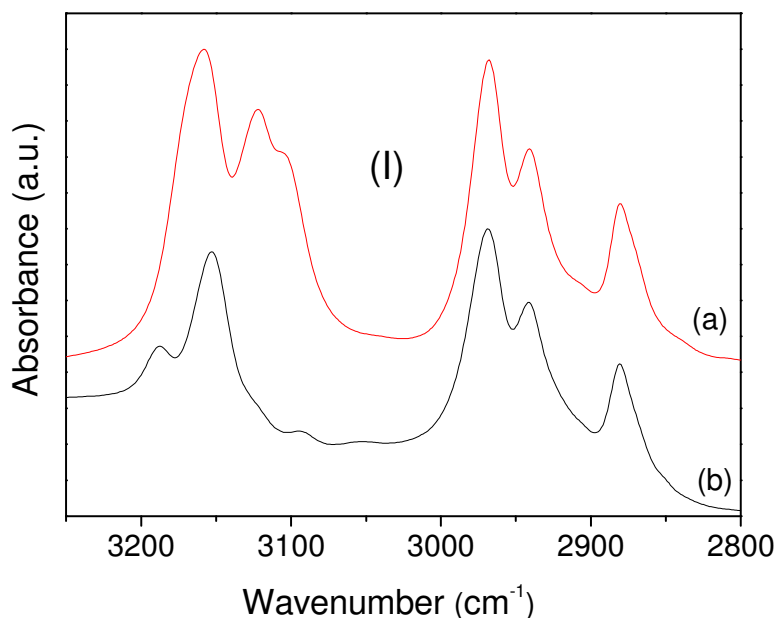

**Figure S2.** FTIR spectra of (a) neat RTIL and (b) **BL-IG** in the region 2850-3200 cm<sup>-1</sup>. (I) corresponds to the region of the spectrum identified in Fig. 2.

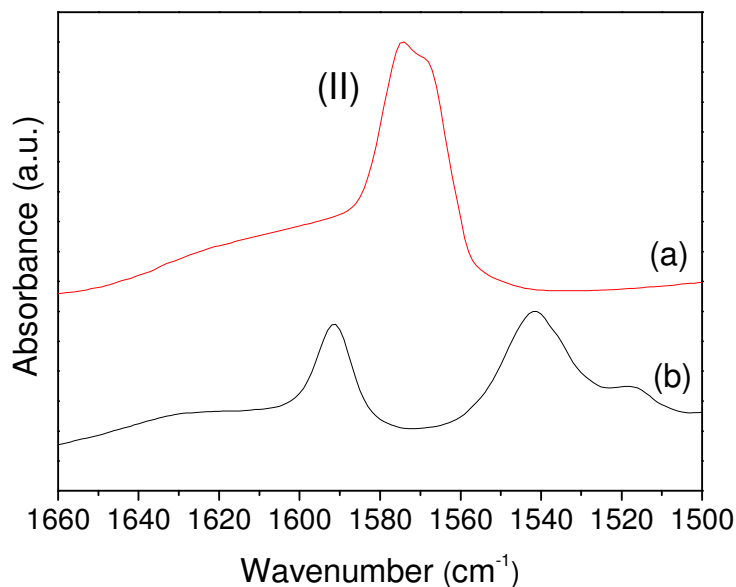

**Figure S3.** FTIR spectra of (a) neat RTIL and (b) **BL-IG** in the region 1500-1660 cm<sup>-1</sup>. (II) corresponds to the region of the spectrum identified in Fig. 2.

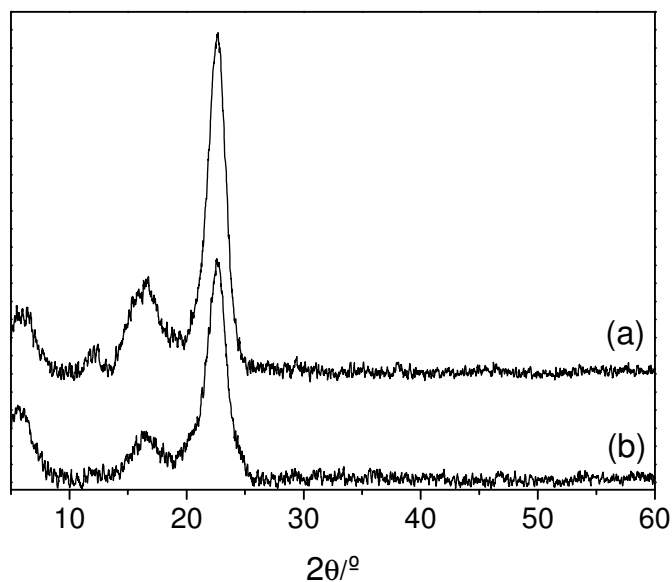

**Figure S4.** Powder XRD diffractograms of (a) **PFO-IG** and (b) **BL-IG**.

The powder XRD patterns are characteristic of an amorphous SiO<sub>2</sub> network. The peaks are assigned to (i) coherent diffracting regions within the siliceous network (~22.6°), (ii) an interparticle scattering interference (~4–6°) and (iii) in-plane ordering of intra-siloxane domains (~15–16°).<sup>3</sup>

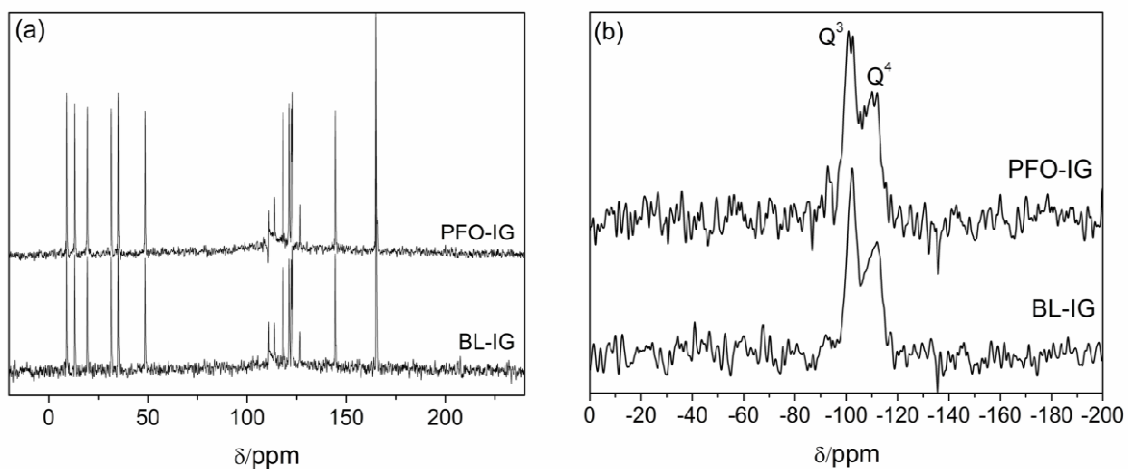

**Figure S5.** (a)  $^{13}\text{C}$  MAS-NMR and (b)  $^{29}\text{Si}$  MAS-NMR of **PFO-IG** and **BL-IG**.

**NMR assignments:**

| 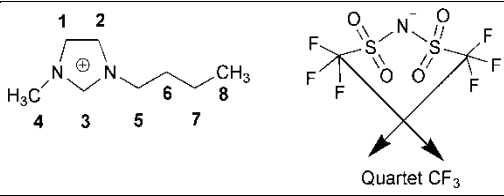              |                                                                                    |
|---------------------------------------------------------------------------------------------------|------------------------------------------------------------------------------------|
| $^{13}\text{C}$ NMR of [Bmim][Ntf <sub>2</sub> ] <sub>2</sub> in CDCl <sub>3</sub> . <sup>4</sup> | $^{13}\text{C}$ MAS NMR of BL-IG containing [Bmim][Ntf <sub>2</sub> ] <sub>2</sub> |
| C1 123.7 ppm                                                                                      | C1 122.7                                                                           |
| C2 122.0 ppm                                                                                      | C2 121.2                                                                           |
| C3 137.7 ppm                                                                                      | C3 144.6                                                                           |
| C4 36.4 ppm                                                                                       | C4 34.9                                                                            |
| C5 49.6 ppm                                                                                       | C5 48.5                                                                            |
| C6 32.1 ppm                                                                                       | C6 31.5                                                                            |
| C7 19.3 ppm                                                                                       | C7 19.4                                                                            |
| C8 13.1 ppm                                                                                       | C8 13.0                                                                            |
|                                                                                                   | CF <sub>3</sub> Quartet (113.8, 118.1, 122.3, 126.6 ppm)                           |
|                                                                                                   | Methanoic acid (formic acid) 164-165 ppm                                           |

The  $^{29}\text{Si}$  MAS-NMR spectra (Fig S5b) of PFO-IG and BL-IG both exhibit broad signals characteristic of Q<sup>3</sup> ( $\equiv\text{SiO}$ )<sub>3</sub>SiOH (~102 ppm) and Q<sup>4</sup> ( $\equiv\text{SiO}$ )<sub>4</sub>Si (~111 ppm) units, indicating the presence of a silica network composed mainly of cyclic units cross-linked by oxygen bridges.<sup>5</sup>

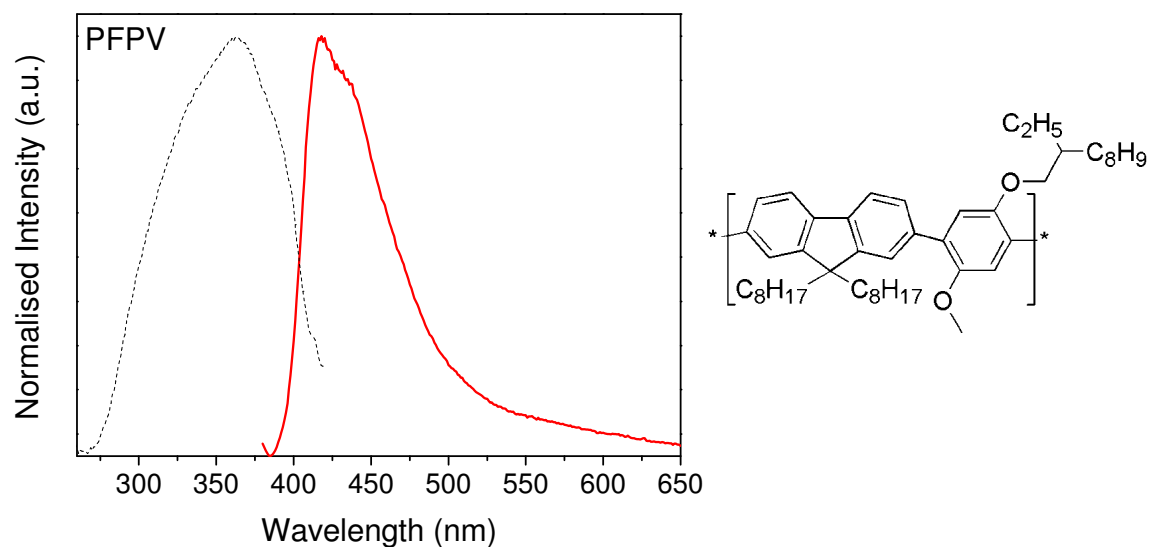

**Figure S6.** Room-temperature photoluminescence ( $\lambda_{\text{ex}} = 370$  nm, solid red line) and excitation spectra ( $\lambda_{\text{em}} = 440$  nm, dashed black line) for **PFPV-IG**. PLQY = 4.2%.

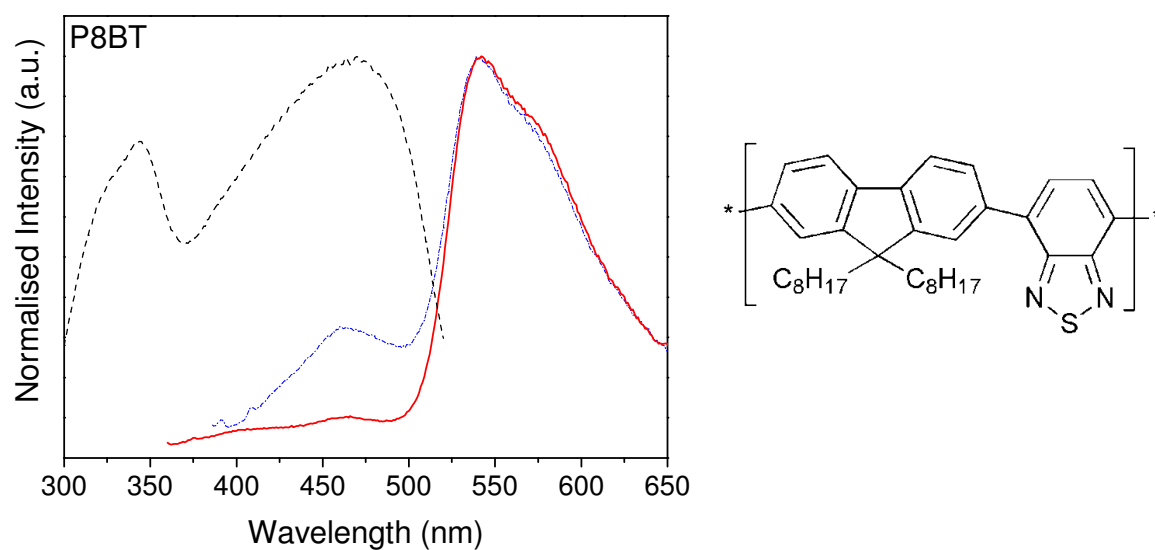

**Figure S7.** Room-temperature photoluminescence and excitation spectra for **P8BT-IG**. PL spectra are shown for selective excitation of the benzothiadiazole ( $\lambda_{\text{ex}} = 350$  nm, solid red line) and fluorene ( $\lambda_{\text{ex}} = 370$  nm, blue dotted line) units. The excitation spectrum was recorded in the benzothiadiazole emission band at 540 nm (black dashed line) and reveals two maxima at *ca.* 348 and 368 nm, indicating energy transfer from the fluorene to the benzothiadiazole unit must contribute to this emission. PLQY = 7.5%.

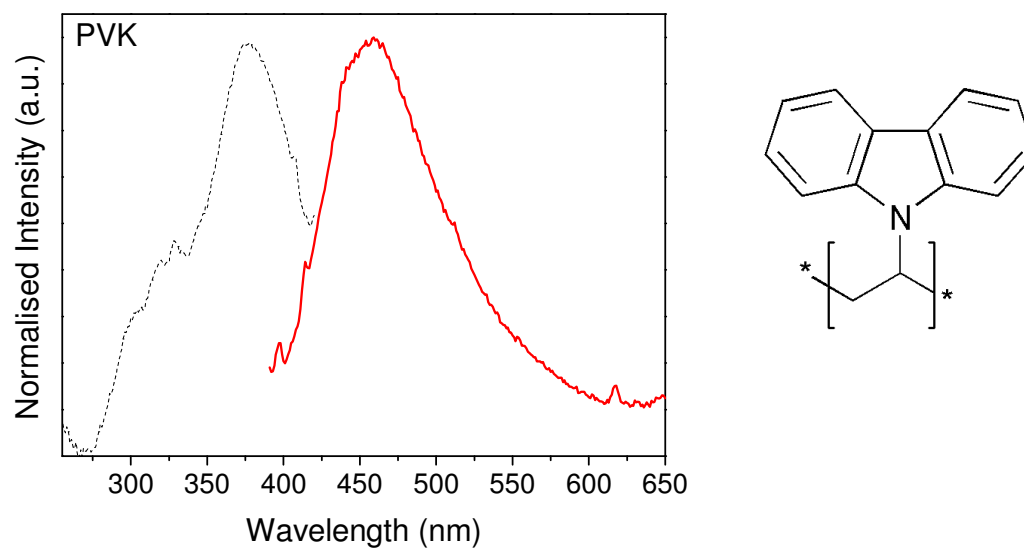

**Figure S8.** Room-temperature photoluminescence ( $\lambda_{\text{ex}} = 370$  nm, solid red line) and excitation ( $\lambda_{\text{ex}} = 460$  nm, dashed black line) spectra for **PVK-IG**. PLQY = 2.2%

| IL<br>$\nu$ (cm <sup>-1</sup> ) | BL-IG<br>$\nu$ (cm <sup>-1</sup> ) | PFO-IG<br>$\nu$ (cm <sup>-1</sup> ) | Assignment                                                                                                           |
|---------------------------------|------------------------------------|-------------------------------------|----------------------------------------------------------------------------------------------------------------------|
|                                 | 574                                | 571                                 | Si–O–Si bend                                                                                                         |
| 616                             | 617                                | 618                                 | Ring CNC op bend                                                                                                     |
| 655                             | 660                                | 698                                 | Ring ip str.                                                                                                         |
| 739                             | 739                                | 741                                 | Ring ip bend, CH <sub>2</sub> (N) and CH <sub>3</sub> (N)CN bend, CF <sub>3</sub> sym. bend, ring ip HCCH.           |
| 760                             | 757                                | 761                                 | Ring HCCH asym. bend, SNS sym. str.                                                                                  |
| 791                             | 790                                | 791                                 | Ring HCCH asym. bend, CS str.                                                                                        |
| 846                             | 955                                | 647                                 |                                                                                                                      |
| 1059                            | 1060                               | 1059                                | Ring ip asym. str., CC str. NCH <sub>3</sub> twist                                                                   |
| 1139                            | 1143                               | 1138                                | CC str.                                                                                                              |
| 1192                            | 1195                               | 1194                                | Ring sym str., CH <sub>2</sub> (N) and CH <sub>3</sub> (N)CN str., CF <sub>3</sub> asym. str.                        |
| 1227                            | 1357                               | 1351                                | Ring ip sym. str., CH <sub>2</sub> (N) and CH <sub>3</sub> (N)CN str.                                                |
| 1421                            | 1421                               | 1425                                | Ring ip sym. str., CH <sub>3</sub> (N) str., CH <sub>3</sub> (N)HCH sym. bend or NC(CH <sub>3</sub> )NHCH sym. bend. |
| 1469                            | 1466                               | 1470                                | Ring ip sym. str., CH <sub>3</sub> (N)CN str.                                                                        |
|                                 | 1538                               | 1541                                | NC(CH <sub>3</sub> )NCN str.                                                                                         |
| 1575                            | 1596                               | 1590                                | Ring ip sym./asym. str., CH <sub>2</sub> (N) and CH <sub>3</sub> (N)CN str.                                          |
| 2879                            | 2880                               | 2879                                | Terminal CH <sub>3</sub> HCH sym. str.                                                                               |
| 2940                            | 2939                               | 2941                                | CH <sub>2</sub> sym. str., CH <sub>3</sub> asym. str.                                                                |
| 2968                            | 2966                               | 2968                                | CH <sub>2</sub> HCH asym. str.                                                                                       |
| 3104                            | -                                  | -                                   |                                                                                                                      |
| 3121                            | -                                  | -                                   | Ring CH str.                                                                                                         |
| 3159                            | 3153                               | 3151                                | Ip and op C4,5-H str.                                                                                                |
| -                               | 3187                               | 3184                                | C4,5-H str.                                                                                                          |
| -                               | 3400                               | 3400                                | Si-OH str.                                                                                                           |
|                                 | (broad)                            | (broad)                             |                                                                                                                      |

**Table S1.** Observed IR bands of RTIL, **PFO-IG** and **BL-IG**. Frequency ( $\nu$ ) and vibrational assignments: sh (shoulder), ip (in-plane), op (out-of-plane), sym (symmetric), asym (asymmetric). Assignments from Ref. <sup>6,7</sup> and references therein.

## References

1. P. Bonhôte, Ana-Paula Dias, N. Papageorgiou, K. Kalyanasundaram, and M. Grätzel *Inorg. Chem.*, 1996, **3**, 1168.
2. J. Pina, H. D. Burrows, R. S. Becker, F. B. Dias, A. L. Maçanita and J. S. de Melo, *J. Phys. Chem. B.*, 2006, **110**, 6499.
3. L. S. Fu, R. A. S. Ferreira, N. J. O. Silva, L. D. Carlos, V. d. Z. Bermudez and J. Rocha, *Chem. Mater.*, 2004, **16**, 1507.
4. S. Hesse-Ertelt, T. Heinze, B. Kosan, K. Schwikal, F. Meister *Macromol. Symp.* 2010, 294-II, 75.
5. G. Engelhardt, in *Encyclopedia of Magnetic Resonance.*, 2007.
6. K. Noack, P. S. Schulz, N. Paape, J. Kiefer, P. Wasserscheid and A. Leipertz, *Phys. Chem. Chem. Phys.*, 2010, **12**, 14153.
7. M. P. Singh, R. K. Singh and S. Chandra, *Chem. Phys. Chem.*, 2010, **11**, 2036.
